# Supplementary material for: A cheaper substitute for HRP: ultra-small Cu–Au bimetallic enzyme mimics with infinitesimal steric hindrance to promote catalytic lateral flow immunodetection of clenbuterol
Source: Royal Society of Chemistry journal article supplement (doi:10.1039/d3lc01079a), 2024-01-01
Supplement: d3lc01079a1.pdf [file d3lc01079a1.pdf]

1 **Supporting Information**

2 **A cheaper substitute for HRP: Ultra-small Cu-Au bimetallic enzyme mimics with infinitesimal**  
3 **steric hindrance to promote catalytic lateral flow immunodetection of clenbuterol**

4 Huilan Hu<sup>a, 1</sup>, Jiaqi Tian<sup>a, 1</sup>, Rui Shu<sup>a</sup>, Huihui Liu<sup>b,\*</sup>, Shaochi Wang<sup>a</sup>, Xuechi Yin<sup>a</sup>, Jianlong Wang<sup>a</sup>  
5 and Daohong Zhang<sup>a,\*</sup>

6 <sup>a</sup> College of Food Science and Engineering, Northwest A&F University, 22 Xinong Road Yangling,  
7 712100, Shaanxi, China

8 <sup>b</sup> Shandong Key Laboratory of Marine Ecological Restoration, Shandong Marine Resource and  
9 Environment Research Institute, No. 216 Changjiang Road, Economic and Technological  
10 Development Zone, 264006, Yantai, Shandong, China

11

12

13

14 <sup>1</sup> Huilan Hu and Jiaqi Tian contributed equally to this work.

15 \*Correspondence author: zhangdh@nwsuaf.edu.cn (D. Zhang), liuhh615@163.com)

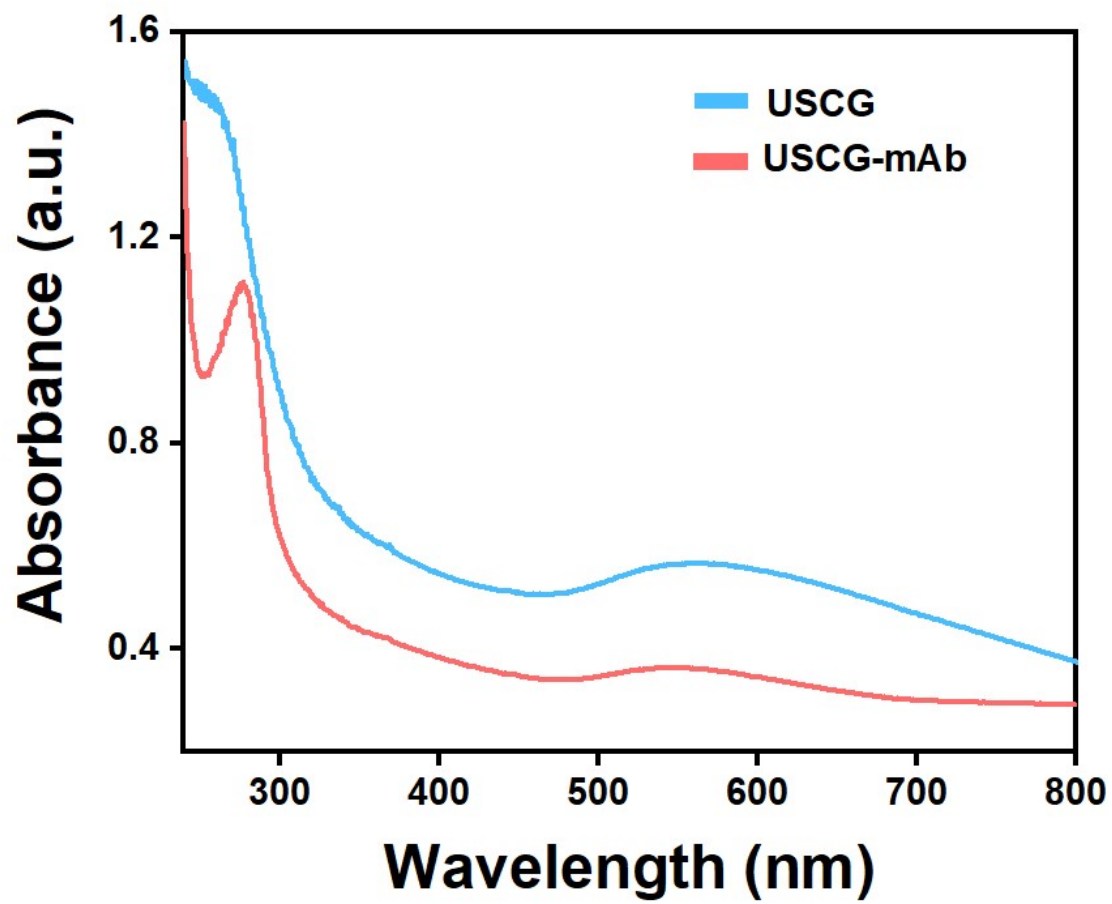

16 **Figure S1.** UV-vis absorption spectra of the USCG, and USCG-mAb.

17

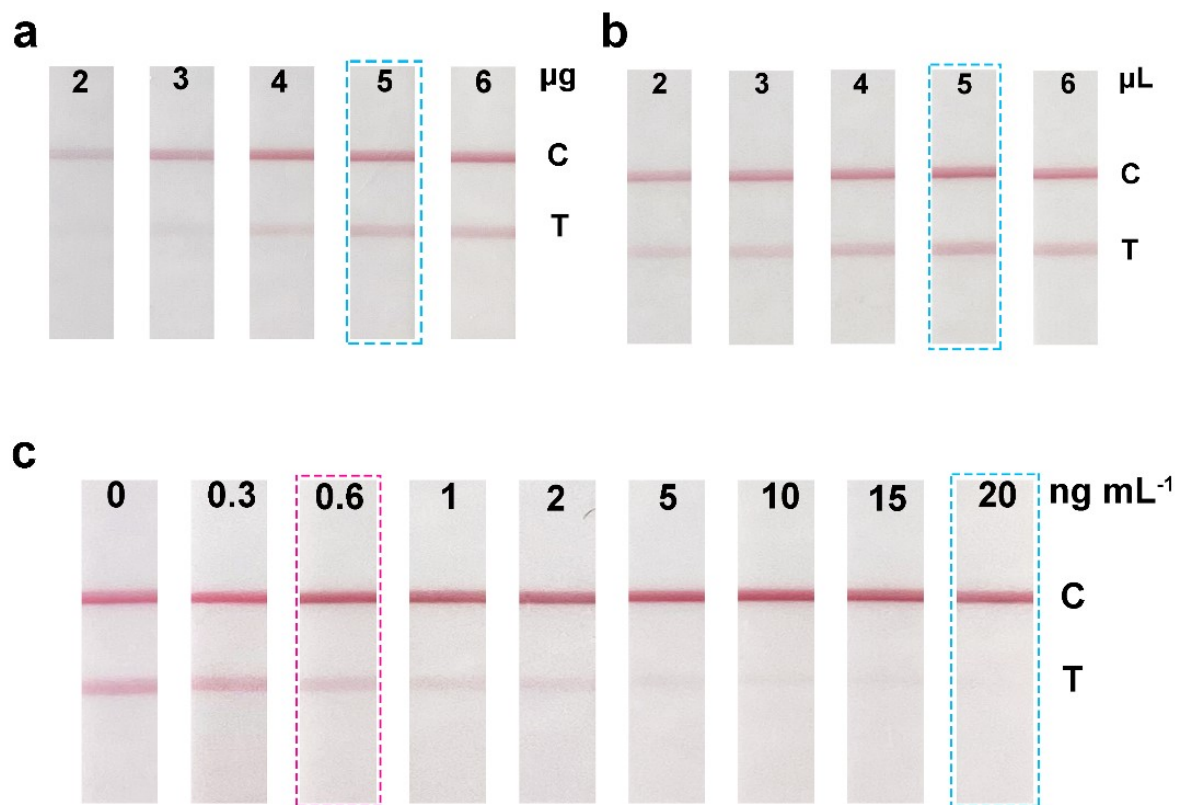

18 **Figure S2.** Optimization results of (a) the amount of anti-CLE mAb and (b) the volume of Au NPs-19 mAb probe. Detection results of (c) the CLE standard solution by the Au NPs-LFIA.

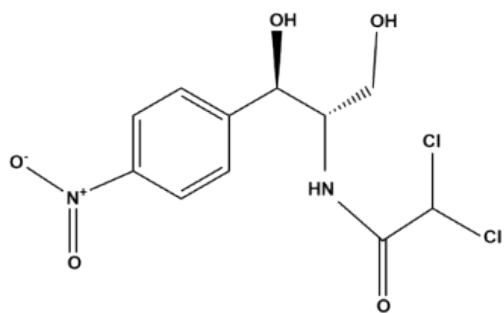

**Chloramphenicol**

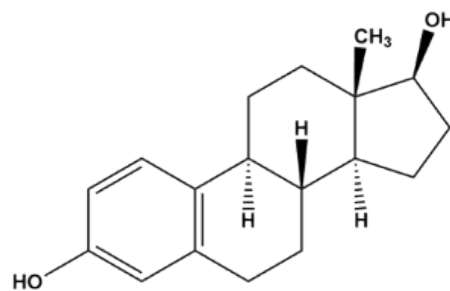

**Estradiol**

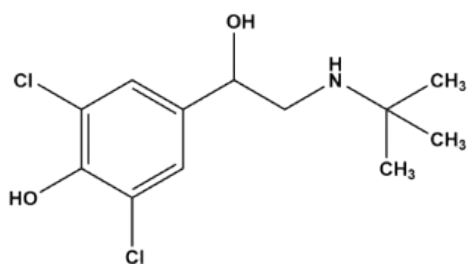

**Clenbuterol**

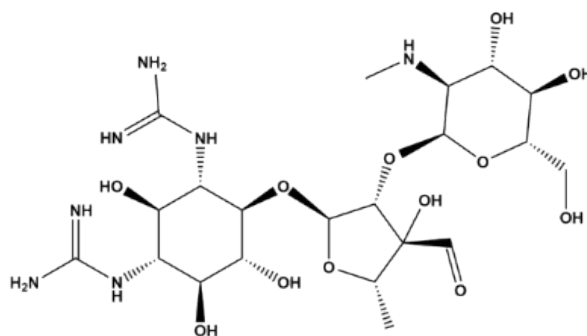

**Streptomycin**

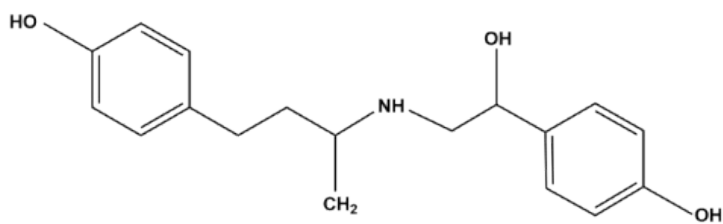

**Ractopamine**

20 **Figure S3.** Chemical structures of the target analyte and tested interfering substances.

21 **Table S1.** Recovery analysis of CLE in actual samples

| Sample | Spiked ( $\mu\text{g L}^{-1}/\mu\text{g kg}^{-1}$ ) | Found ( $\mu\text{g L}^{-1}/\mu\text{g kg}^{-1}$ ) | Recovery (%) | SD (%) |
|--------|-----------------------------------------------------|----------------------------------------------------|--------------|--------|
|        | 0.5                                                 | $0.54 \pm 0.02$                                    | 107.21       | 1.66   |
| Milk   | 1                                                   | $1.06 \pm 0.01$                                    | 106.32       | 0.91   |
|        | 2                                                   | $2.02 \pm 0.05$                                    | 100.99       | 5.31   |
|        | 0.5                                                 | $0.57 \pm 0.05$                                    | 115.07       | 5.29   |
| Mutton | 1                                                   | $1.09 \pm 0.03$                                    | 109.55       | 2.56   |
|        | 2                                                   | $1.97 \pm 0.05$                                    | 98.53        | 5.16   |
|        | 0.5                                                 | $0.58 \pm 0.05$                                    | 117.79       | 5.42   |
| Pork   | 1                                                   | $1.01 \pm 0.01$                                    | 100.54       | 1.15   |
|        | 2                                                   | $1.98 \pm 0.01$                                    | 99.04        | 0.51   |

22

23 **Table S2.** Comparison of Michaelis-Menten constants ( $K_m$ ) and maximum initial reaction rates  
 24 ( $V_{max}$ ) of the peroxidation reaction catalyzed by USCG, HRP, and other peroxidase-like nanozymes

| Materials               | $K_m$ (mM) |                               | $V_{max}$ ( $10^{-8}$ M s $^{-1}$ ) |                               | Reference |
|-------------------------|------------|-------------------------------|-------------------------------------|-------------------------------|-----------|
|                         | TMB        | H <sub>2</sub> O <sub>2</sub> | TMB                                 | H <sub>2</sub> O <sub>2</sub> |           |
| HRP                     | 0.432      | 3.702                         | 10.00                               | 8.71                          | 1         |
| Au@Pt                   | 0.020      | 76.000                        | 2.91                                | 0.75                          | 2         |
| Cu-hemin MOFs           | 1.420      | 2.180                         | 26.22                               | 116.00                        | 3         |
| Cu(OH) <sub>2</sub> SCs | 2.448      | 0.199                         | 44.80                               | 42.50                         | 4         |
| CuMnO <sub>2</sub>      | 0.577      | 27.653                        | 8.15                                | 27.65                         | 5         |
| CuO                     | 0.025      | 0.400                         | 10.49                               | 16.10                         | 6         |
| RhNPs                   | 0.198      | 0.380                         | 6.78                                | 24.10                         | 7         |
| CuS-PDA-Au              | 0.1082     | 0.229                         | 102.9                               | 16.56                         | 8         |
| USCG                    | 0.013      | 0.107                         | 81.32                               | 20.75                         | This work |

25

26 **Table S3.** Comparison of analytical performances for CLE detection by different methods  
 27 immunoassays

| Detection method                                                            | Linear range (ng mL <sup>-1</sup> ) | cLOD (ng mL <sup>-1</sup> ) | Reference |
|-----------------------------------------------------------------------------|-------------------------------------|-----------------------------|-----------|
| Molecularly imprinted polymer-lateral flow immunoassay                      | 1–50                                | 0.3                         | 9         |
| Integrated immunomagnetic separation-fluorescence lateral flow immunoassay  | 0.25–5                              | 0.16                        | 10        |
| Streptavidin magnetic particles-fluorometric immunoassay                    | 0.5–40                              | 0.167                       | 11        |
| GO/AuNPs-surface-enhanced Raman spectroscopy                                | 0.5–20                              | 0.5                         | 12        |
| SeNPs-lateral flow immunoassay                                              | -                                   | 3                           | 13        |
| MoS <sub>2</sub> -Au-polyethylenimine modified-glassy carbon electrode      | 10–2,000                            | 1.92                        | 14        |
| Molecularly imprinted polymers@Upconversion particles-fluorescence analysis | 5–100                               | 0.12                        | 15        |
| S/N-doped carbon quantum dots-fluorometric immunoassay                      | 0.07–1.7                            | 0.023                       | 16        |
| Fe <sub>3</sub> O <sub>4</sub> microspheres-immunoassay                     | 0.1-10                              | 0.02                        | 17        |
| CdSe quantum dots-electrochemiluminescent immunosensor                      | 0.05-1000                           | 0.02                        | 18        |
| AuNPs-rhodamine 6G-fluorescence inner filtration immunoassay                | 0.03–5.0                            | 0.01                        | 19        |
| Gold nanoparticles-surface-enhanced Raman spectroscopy                      | 0.0001–0.1                          | 0.0001                      | 20        |
| Fe <sub>3</sub> O <sub>4</sub> @AuNPs- surface-enhanced Raman spectroscopy  | -                                   | 2.2*10 <sup>-7</sup>        | 21        |
| USCA-based LFIA                                                             | 0.05-1                              | 0.03                        | This work |

28

29 **Table S4.** Optimal assay conditions for the USCG-based LFIA

| <b>Item</b>                    | <b>Composition</b>      | <b>Optimized condition</b>                        |
|--------------------------------|-------------------------|---------------------------------------------------|
| C line                         | Goat anti-mouse IgG     | 2 mg mL <sup>-1</sup> , 0.5 μL cm <sup>-1</sup>   |
| T line                         | CLE-BSA                 | 0.4 mg mL <sup>-1</sup> , 0.5 μL cm <sup>-1</sup> |
| Blocking buffer for sample pad | Phosphate buffer saline | 2% BSA in PBS                                     |

30



## 31 References

- 32 1. L. Luo, L. Huang, X. Liu, W. Zhang, X. Yao, L. Dou, X. Zhang, Y. Nian, J. Sun and J. J. I. c.  
33 Wang, 2019, 58, 11382-11388.
- 34 2. X. Hu, A. Saran, S. Hou, T. Wen, Y. Ji, W. Liu, H. Zhang, W. He, J.-J. Yin and X. J. R. a. Wu,  
35 2013, 3, 6095-6105.
- 36 3. F. Liu, J. He, M. Zeng, J. Hao, Q. Guo, Y. Song and L. J. J. o. N. R. Wang, 2016, 18, 1-9.
- 37 4. R. Cai, D. Yang, S. Peng, X. Chen, Y. Huang, Y. Liu, W. Hou, S. Yang, Z. Liu and W. J. J. o. t.  
38 A. C. S. Tan, 2015, 137, 13957-13963.
- 39 5. J. Hu, R. Huang, Y. Sun, X. Wei, Y. Wang, C. Jiang, Y. Geng, X. Sun, J. Jing, H. Gao, Z. Wang  
40 and C. Dong, *J. Microbiol. Methods*, 2019, 158, 25-32.
- 41 6. A. P. Nagvenkar, A. J. A. a. m. Gedanken and interfaces, 2016, 8, 22301-22308.
- 42 7. T. G. Choleva, V. A. Gatselou, G. Z. Tsogas and D. L. J. M. A. Giokas, 2018, 185, 1-9.
- 43 8. Y. Wang, Y. Liu, F. Ding, X. Zhu, L. Yang, P. Zou, H. Rao, Q. Zhao, X. J. A. Wang and b.  
44 chemistry, 2018, 410, 4805-4813.
- 45 9. H. Zhou, Z. Zhang, D. He, Y. Hu, Y. Huang and D. J. A. c. a. Chen, 2004, 523, 237-242. ✓
- 46 10. Z. Huang, Z. Xiong, Y. Chen, S. Hu, W. J. J. o. a. Lai and f. chemistry, 2019, 67, 3028-3036.
- 47 11. T. Peng, J. Wang, S. Zhao, S. Xie, K. Yao, P. Zheng, S. Wang, Y. Ke and H. Jiang, *Mikrochim*  
48 *Acta*, 2018, 185, 366. ✓
- 49 12. J. Cheng, X.-O. Su, S. Wang and Y. J. S. r. Zhao, 2016, 6, 1-10.
- 50 13. Z. Wang, J. Jing, Y. Ren, Y. Guo, N. Tao, Q. Zhou, H. Zhang, Y. Ma and Y. J. M. L. Wang,  
51 2019, 234, 212-215.
- 52 14. Y. Yang, H. Zhang, C. Huang, D. Yang, N. J. B. Jia and *Bioelectronics*, 2017, 89, 461-467. ✓
- 53 15. Y. Tang, Z. Gao, S. Wang, X. Gao, J. Gao, Y. Ma, X. Liu, J. J. B. Li and *Bioelectronics*, 2015,  
54 71, 44-50.
- 55 16. D. Yao, A. Liang and Z. Jiang, *Microchimica Acta*, 2019, 186, 1-9.
- 56 17. K. Fan, D. Li, H. Liu and J. Wu, *Instrumentation Science & Technology*, 2015, 43, 5, 524-535.
- 57 18. X. Yao, P. Yan, Q. Tang, A. Deng and J. Li, *Analytica Chimica Acta*, 2013, 798, 82-88.
- 58 19. F. Peng, B. Li, S. Sun, F. Mi, Y. Wang, C. Hu, P. Geng, L. Pang, M. Guan and J. Li, *European*  
59 *Food Research and Technology*, 2022, 1-12.
- 60 20. G. Zhu, Y. Hu, J. Gao and L. Zhong, *Analytica Chimica Acta*, 2011, 697, 1-2, 61-66.
- 61 21. C. Wei, C. Zhang, M. Xu, Y. Yuan and J. Yao, *Journal of Raman Spectroscopy*, 2017, 48, 1307-  
62 1317.
